# Supplementary figures and images for: Cu–phytic acid nanozyme-induced cuproptosis therapy for the inhibition of tumor growth
Source: Royal Society of Chemistry journal article supplement (doi:10.1039/d5nh00183h), 2025-01-01

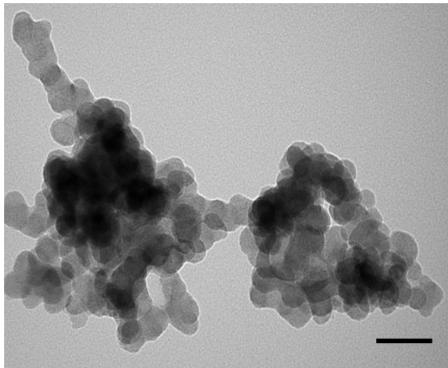

Supplement: d5nh00183h2.pdf [file d5nh00183h2.pdf]
